# Supplementary material for: Mesenchymal Stem Cells for Regenerative Therapy: Optimization of Cell Preparation Protocols
Source: Biomed Res Int. 2014 Jan 6;2014:951512. doi: 10.1155/2014/951512 (PMC3912818; doi:10.1155/2014/951512)
Supplement: Supplementary file 1 — MSC-preparation protocols used in 47 recent clinical trials of MSC-based therapy, published from January 2007 onwards, are summarised in Supplementary Table 1. References used in Supplementary Table 1 are found in Supplementary References. [file 951512.f1.xlsx]

## Sheet: Sheet1
Supplementary Table 1. Summary of MSC production protocols in 47 clinical trials
No	Year	Ref	Author	Disease	Auto/Allo	MSC Number Injected	BM Preparation	Plating Density (P0)	Flask for Isolation	Flask for Expansion	Plating Density	Basal Medium	Glutamine	Other supplements	Serum	Passages	Trypsin Dose	Cryopreservation	Injection Vehicle
1	2007	55	Falanga	Cutaneus wounds	Auto	2x10^6/cm2	Ficoll-paque TM plus	no info	no info	no info	no info	MSC Media (Stem Cell Tech)			10% mesenchymal stimulatory supplement	≤ P10	0.05% Trypsin	No	no info
2	2007	56	Ball	Hematopoietic stem cell transplantation	Allo	1.6x10^6/kg	Ficoll	1.6x10^5/cm2	no info	no info	4000/cm2	DMEM-lowglucose			10% FBS	≤ P3	Trypsin	Yes	no info
3	2007	57	Mohyeddin-Bonab	Myocardial infarction	Auto	5.55x10^6	Ficoll	2.8x10^5/cm2	no info	no info	2800/cm2	DMEM			10% FBS	no info	0.025% Trypsin	No	Saline (1% HSA)
4	2007	58	Katritsis	Myocardial infarction	Auto	3.36x10^6	Ficoll	no info	no info	no info	no info	DMEM-lowglucose			10% FBS	P0	no info	No	Saline
5	2007	59	Mohyeddin-Bonab	MS	Auto	8.73x10^6	Ficoll	2.8x10^5/cm2	no info	no info	2800/cm2	DMEM			10% FBS	no info	0.025% Trypsin	No	Saline (1% HSA)
6	2007	60	Mohamadnejad	Decompensated liver cirrhosis	Auto	3.17x10^7	Ficoll-hypaque	1x10^6/cm2	Nunc	Nunc	1/3 dilution	DMEM-lowglucose			10% FBS	P2-P4	0.25% Trypsin	No	Saline (1% HSA)
7	2007	61	Ringden	Hemorrhagic cystitis	Allo	1x10^6/kg	Redigrad (Amersham Biosciences AB)	1.6x10^5/cm2	no info	no info	4000/cm2	DMEM-lowglucose			10% FBS	P1-P3	Trypsin	No	Saline (10% AB plasma)
				Pneumomediastinum, Perforated colon
8	2008	62	Lee	Multiple system atrophy	Auto	4x10^7 (x4)	Ficoll	no info	Falcon	Falcon	no info	DMEM-lowglucose			10% FBS	no info	0.25% Trypsin	No	Saline
9	2008	63	Muller	Hematopoietic stem cell transplantation	Allo	1.7x10^6/kg (x several)	Whole BM	no info	Corinig	Corinig	2000/cm2	DMEM-lowglucose	1mM glutamine		10% FBS	no info	Trypsin	No	Saline (0.1% HSA)
10	2008	64	Le Blanc	Acute GVHD	Allo	1.4x10^6/kg (x several)	Ficoll	1.6x10^5/cm2	Falcon / Greiner	Falcon / Greiner	4000/cm2	DMEM-lowglucose			10% FBS	P1-P4	Trypsin	Yes/No	Saline
11	2008	65	Ning	Hematologic malignancy	Allo	0.34x10^6/kg	Percoll	2x10^5/cm2	Corning	Corning	5700/cm2	DMEM-lowglucose			10% FBS	no info	0.05% Trypsin	No	no info
12	2008	66	Mazzini	ALS	Auto	5.7x10^7	Percoll	8x10^5/cm2	no info	no info	8000/cm2	MSC Medium (Cambrex Bioscience)			10% FBS	P2-P3	Trypsin	No	Autologous cerebrospinal fluid
13	2008	67	Centeno	Degenerative joint disease	Auto	2.24x10^7	Whole BM	1x10^6/cm2	no info	no info	12000/cm2	DMEM (P0), aMEM (P1-)			5%,10%, 20% PL	P5	Trypsin	No	PBS
14	2009	68	Sun	SLE	Allo	≥1x10^6/kg	Ficoll-hypaque	no info	Corning	no info	no info	DMEM			10% FBS	P3-P4	0.25% Trypsin	No	Saline (5% HSA)
15	2009	69	von Bonin	Acute GVHD	Allo	0.9x10^6/kg (x2)	Biocoll (Biochrom)	6x10^4-1x10^5/cm2	Greiner	Greiner	5000/cm2	DMEM-lowglucose			10% PL	P1-P2	TrypZean (Sigma)	Yes	no info
16	2009	70	Kursova	Radiation-induced lung injuries	Auto	no info	Whole BM	2-4x10^5/cm2	no info	no info	no info	RPMI-1640	2mM L-glutamine		20% FBS	no info	0.25% Trypsin	No	no info
17	2009	71	Meuleman	Hematological disease	Allo	1x10^6/kg	LinfoSep (Biomedics)	no info	no info	no info	1000/cm2	Ultra-culture medium (Cambrex Bioscience)	2mM L-glutamine		2% serum substitute (Ultroser G)	P2-P3	TrypLE select (Gibco)	No	no info
18	2010	72	Haleem	Articular cartilage defects	Auto	2x10^6/cm2	Ficoll-paque	no info	no info	no info	no info	DMEM			10% FBS	P1	0.25% Trypsin	No	PBS
19	2010	73	Yamout	MS	Auto	3-10x10^7	Ficoll	no info	no info	no info	no info	DMEM-lowglucose	L-glutamine		10% FBS	P4-P5	0.25% Trypsin	No	Saline
20	2010	74	Karussis	MS, ALS	Auto	6.32x10^7	Whole BM	no info	no info	no info	no info	DMEM-lowglucose	1% L-glutamine		10% FBS	no info	no info	Yes	Saline
21	2010	75	Duijvestein	Crohn's disease	Auto	1-2x10^6/kg (x2)	Ficoll	1.6x10^5/cm2	Greiner	Greiner	4000/cm2	DMEM-lowglucose			10% FBS	≤ P3	Trypsin	Yes	no info
22	2010	37	Venkataramana	Parkinson's disease	Auto	1x10^6/kg	Lymphoprep density gradient	no info	Falcon	Corinig	5000/cm2	KO-DMEM	200mM Glutamax	2ng/ml bFGF	10% FBS	P1	0.25% Trypsin	No	Saline
23	2010	76	Carrion	SLE	Auto	1x10^6/kg	Ficoll-hypaque	1.1x10^3/cm2	no info	no info	no info	DMEM-lowglucose			10% FBS	no info	Tryple select (Gibco)	No	Autologous serum
24	2010	77	Baron	GVHD	Allo	no info	Ficoll	no info	Falcon	Falcon	no info	DMEM-lowglucose	L-glutamine		10% FBS	P2	Trypsin	Yes	PBS
25	2010	78	Liang	SLE	Allo	1x10^6/kg	Ficoll-hypaque	1x10^6/cm2	no info	no info	10000/cm2	DMEM-lowglucose			10% FBS	P3-P5	no info	No	no info
26	2010	79	Lee	Ischemic stroke	Auto	5x10^7 (x2)	Ficoll	no info	Falcon	Falcon	no info	DMEM-lowglucose			10% FBS	no info	no info	No	Saline
27	2010	80	Zhou	Chronic GVHD	Allo	1-2x10^7 (x4-8)	Ficoll-paque	1x10^6/ml	no info	no info	no info	DMEM-F12-lowglucose, 40%MCDB-201medium		1-insulin transferring selenium,	2% FBS	P3-P6	0.05% Trypsin	No	no info
														1/10^9M dexamethasone, 1/10^4M ascorbic acid
														10ng/ml EGF, 10ng/ml PDGF-BB
28	2010	81	Zhang	Hematologic diseases	Allo	1.77x10^6/kg	Percoll	3.3-8.3x10^4/cm2	Corning	Corning	3333/cm2	MesenCult Human MSC Basal Medium (Stemcell)			10% human MSC stimulatory supplements	P3-P4	0.25% Trypsin	Yes	Saline
															(Stemcell)
29	2010	82	Weng	Chronic GVHD	Allo	0.6x10^6/kg (x1-5)	Ficoll-paque	5x10^3/cm2	no info	no info	1/3 dilution	DMEM-lowglucose			10% FBS	P2-P3	Trypsin	No	no info
30	2010	83	Yang	Myocardial infarction	Auto	1.2x10^7, 1.3x10^7	Ficoll	no info	no info	no info	no info	IMDM			no info	no info	no info	No	Serum free medium
31	2011	84	Davatchi	Knee osteoarthritis	Auto	8-9x10^6	Ficoll-hypaque	2.8x10^5/cm2	no info	no info	2800/cm2	DMEM			10% FBS	P1	0.025% Trypsin	No	Saline (2% HSA)
32	2011	85	Lasala	Refractory coronary ischemia	Auto	7.5x10^6	Histopaque	no info	no info	no info	no info	aMEM			10% FBS	P1-P2	no info	No	PBS (5% HSA)
33	2011	86	Williams	Ischemic cardiomyopathy	Auto	1x10^8, 2x10^8	Lymphocyte separation (MediaTech Inc)	no info	no info	no info	no info	aMEM			20% FBS	P1	Trypsin	Yes	PBS (1% HSA)
34	2011	87	Connick	MS	Auto	1-2x10^6/kg	Ficoll-paque	1.6x10^5/cm2	Nunc	Nunc	5538/cm2	DMEM-lowglucose			10% FBS	no info	0.25% Trypsin	Yes	no info
35	2011	88	Ciccocioppo	Crohn's disease	Auto	2.0x10^7 (x 2-5)	Ficoll	1.6x10^5/cm2	no info	no info	4000/cm2	DMEM-lowglucose			5% PL	P3	Trypsin	Yes	Saline (20% HSA)
36	2011	89	Perico	Kidney transplantation	Auto	1.85x10^6/kg	Whole BM	5x10^5/cm2	Corning	Corning	200/cm2	aMEM			5% PL	P1	TrypLE Express	Yes	no info
37	2011	90	Honmou	Stroke	Auto	0.6-1.6x10^8	Whole BM	no info	Iwaki	no info	10000/ml	DMEM	2mM L-glutamine		10% autologous serum	≤ P3	Trypsin	Yes	no info
38	2011	91	Wang	Polymyositis and dermatomyositis	Allo	1x10^6/kg (x several)	Density gradient centrifugation	1x10^6/cm2	no info	no info	10000/cm2	DMEM-lowglucose			10% FBS	P2-P5	no info	No	no info
39	2012	92	Tan	Kidney transplantation	Auto	1-2x10^6/kg (x2)	Percoll	no info	no info	no info	5700/cm2	DMEM-lowglucose			no info	P3-P4	no info	No	no info
40	2012	93	Karamouzian	Subacute spinal cord injuy	Auto	7x10^5-1.2x10^6	Ficoll	no info	Falcon	-	-	DMEM-F12		1% insulin-transferrin-selenium solution	10% FBS	P0	0.05% Trypsin	No	Autologpous cerebrospinal fluid
41	2012	94	Kuzmina	Acute GVHD	Allo	1.1x10^6/kg	Whole BM	1.54x10^5/cm2	Corning	Corning	4000/cm2	aMEM	2mM L-glutamine		4% PL	P0-P3	Trypsin	Yes/No	Polyglucin
42	2012	95	Connick	MS	Auto	1.6x10^6/kg	Ficoll-paque	1.6x10^5/cm2	Nunc	Nunc	5538/cm2	DMEM-lowglucose			10% FBS	P1	0.25% Trypsin	Yes	no info
43	2012	96	Herrmann	Acute and chronic GVHD	Allo	1.7-2.3x10^6/kg (x several)	Density gradient centrifugation	1.6x10^5/cm2	no info	Corning	5000/cm2	DMEM			10% FBS	P2-P3	TrypLE-select	Yes	no info
44	2012	97	EI-Ansary	HCV induced liver cirrhosis	Auto	1x10^6/kg	Ficoll	2x10^5/ml	no info	no info	no info	aMEM (day0-day1), MSC Media (Cambrex Bioscience, day1-)			10% FBS (day0-day1)	P5	Trypsin	No	Saline
45	2012	98	Lee	Multiple system atrophy	Auto	4x10^7 (x4)	Ficoll-hypaque	1x10^6/ml	Nunc	Nunc	no info	DMEM-lowglucose			10% FBS	no info	0.05% Trypsin	Yes	Saline
46	2013	99	Reinders	Renal transplantation	Auto	1x10^6/kg (x2)	Ficoll	1.6x10^5/cm2	Greiner	Greiner	4000/cm2	DMEM-lowglucose			10% FBS	P1-P3	Trypsin	Yes	no info
47	2013	100	Mohamadnejad	Decompensated cirrhosis	Auto	1.95x10^8	Ficoll-hypaque	1x10^6/cm2	Nunc	Nunc	1/3 dilution	DMEM-lowglucose			10% FBS	P3-P4	0.25% Trypsin	No	Saline
